# Supplementary material for: Extensive and anomalous grounding line retreat at Vanderford Glacier, Vincennes Bay, Wilkes Land, East Antarctica
Source: Copernicus journal article supplement (doi:10.5194/tc-2022-217), 2022-12-05
Supplement: Supplementary file [file tc-2022-217-AC2-supplement.pdf]

# Review 2 - Anonymous

Hannah Picton

March 2023

In this manuscript, Picton et al. use a range of remotely sensed datasets to examine recent glaciological changes within Vincennes Bay, East Antarctica. Amongst other interesting indicators of glacier change, they report, most notably, upon the rapid retreat of Vanderford Glacier's grounding line at a rate of 0.8 km/yr between 1996 and 2020.

Overall, the paper is generally well-presented, well-structured and is scientifically robust, and even considering the observations of Vanderford Glacier's behavior alone – which places it as the 4th fastest retreating glacier in Antarctica over the satellite era – I believe this manuscript will be of broad interest to the readership of *The Cryosphere*. For this reason, I recommend publication. Prior to publication, however, I believe the manuscript has several limitations in its current form which should be addressed. These limitations are detailed in my comments below.

We thank the anonymous reviewer for their positive feedback on the manuscript and constructive suggestions. Please find our responses to the general, minor and technical comments outlined below.

## 1 General Comments

*Vanderford grounding-line retreat.* While the retreat rate reported here is undoubtedly significant, the problem is that it is for the most part not a new finding. This is because, as the authors themselves allude to on Line 84, Rignot et al. (2019) have previously reported upon this behavior as observed between 1996 and 2017 (over which time they also find a retreat rate of 0.8 km/yr). In this regard there are two key issues with the manuscript in its current form:

- 1) The grounding-line retreat-related findings – as presently reported at least – are perhaps more incremental than the narrative of the manuscript would suggest.
- 2) Apart from the introduction (Line 84), no further acknowledgement of Rignot et al.'s earlier observations is included, which could be misconstrued by some as slightly disingenuous.

To remedy these issues, I would suggest the authors:

- 1) Rework the text to contextualize their findings more clearly alongside this earlier research. (In e.g. the abstract and conclusion, phrasing like “Our results confirm extensive grounding-line retreat. . .” is used, but this doesn't make it explicit that this is a confirmation of a previously documented observation). More explicit follow-up discussion of the fact that the author's observations show continued retreat since 2017 would also be beneficial, and serve to demonstrate that their research goes beyond that discussed by Rignot et al.

We appreciate that this could be misconstrued by some as slightly disingenuous, which was certainly not our intention. We will therefore ensure that is emphasised throughout the manuscript that our study not only supports the 0.8 km/yr of grounding line retreat **previously** observed at Vanderford by Rignot et al. (2019), but importantly also suggests **continued** rapid retreat has occurred between 2017 and 2020.

- 2) What's also new (and arguably much more interesting) relative to the simple trend of 0.8 km/yr reported here and in Rignot et al. (2019) is the seemingly step-wise, temporally variable patterns of retreat observed between 1996 and 2021 (Fig. 8). I think a more explicit/nuanced discussion of this phenomenon and its links with e.g. changes in bed topography/MISI (or otherwise) as seen in Fig.

9 would make for a much more interesting read, while again going beyond that described in Rignot et al. (2019). (See also my **Minor Comment** on Fig.9 below).

Please see our comments below for further detail regarding Figure 8 and Figure 9. However, we will include more explicit discussion of the temporally variable patterns of retreat observed, particularly emphasising the sustained and consistent retreat observed at Vanderford Glacier.

*Structure/presentation of manuscript.* While generally well-presented/written overall, I believe the manuscript could also be overhauled in places (abstract, discussion and conclusion especially) to offer a more succinct / 'to the point' discussion of the key points and novel findings only. Perhaps most importantly, I think the structure of the discussion requires some careful refocusing, as at present it contains a lot of unnecessary details which should either be moved to the Methods, Results or Supplementary Information. Elements of the Discussion and Conclusion also have the tendency to jump back and forth between ideas and/or from one sub-section to the next, which I think should be corrected for improved readability. (See my **Minor Comments** below for some examples of these sorts of issues).

We recognise that parts of the manuscript, particularly the abstract, discussion and conclusion, could be made more succinct and corrected for improved readability. We will therefore make a number of changes, with specific examples provided in our response to the minor comments outlined below.

## 2 Minor Comments

L13 - The ice surface velocity, thinning and GL position datasets are also derived from remotely sensed techniques, so I suggest rephrasing the sentence to better convey this point.

This sentence will be rephrased in order to better convey this point.

L13 - synthetic aperture radar.

This will be changed to state 'synthetic aperture radar'.

L34 - driven - dominated (I agree that these are the two main glaciers, but other parts of the coast are just as sensitive to oceanic influence and are now contributing to these trends too).

'driven' will be changed to 'dominated'.

L57 - 'measured to' - 'having undergone'?

'measured to' will be changed to 'having undergone'.

L60 - Weaker easterly winds relative to what and where? This was unclear to me. This line should be revised to clarify this.

This will be clarified by stating 'Wilkes Land is characterised by a 'warm shelf' regime, whereby weak easterly winds and an absence of dense water formation facilitates the intrusion of warm CDW onto the continental shelf (Thompson et al., 2018; Stokes et al., 2022).'

Figure 1 - Nice figure. Could 1b be underlain by hillshade and/or contours to make the topography 'pop out' more? In 1a, I also strongly recommend displaying the most recent GL (or ideally all of those included in your timeseries if the figure doesn't look too cluttered) to give the reader an instant sense of how each glacier has retreated through time. To help the reader find the locations referred to in the text (e.g., L81), please also add lat/lon graticules to both panels (and all other maps for that matter).

Figure 1b will be underlain by a hillshade and/or contours in order to make the topography more clearly visible. Tick marks and longitude/latitude gridlines will also be added to all maps. However, the decision was made to only display the oldest GL position for two main reasons:

1) Figure 1 is primarily intended to introduce the regional context of the study area, particularly highlighting the location of Vincennes Bay relative to Totten Glacier and Law Dome, as well as displaying the positions of the central glacier flowlines and FT, GL and IN sampling boxes used for

analysis. We believe that the inclusion of additional GL positions from the timeseries detracts from these important features, with Figure 1 appearing rather cluttered.

2) Showing the most recent GL position would effectively display the main results of the paper within the first figure, which we don't think would necessarily be appropriate. We would also like to emphasise that for Vanderford, Adams and Anzac, the most recent GL position would be the 2020 AIS CCI position, whilst for Bond East, Bond West and Underwood it would be the 2014 MOA position. Displaying these different datasets prior to their introduction, description and explanation in Section 2.5, may be rather confusing to the reader.

L101+ - Here, I suggest removing the methodological detail behind the analyses performed (terminus position, velocity, elevation, GL change) as this information is better placed in the following section.

Whilst we recognise that this paragraph includes some methodological detail, these details are summarised very succinctly. We think that the inclusion of this short paragraph provides an important link between the introduction and the methods section, outlining how the stated aim is to be achieved. We therefore suggest that this section improves the overall readability of the manuscript and should remain unchanged.

L109 - 'USGS Earth Explorer data repository, with...'

'data repository' will be added.

L112 - - Why was co-registration of the earlier scenes performed? I presume this pertains to the old ephemerides and DEMs used for geocoding Landsat 1-4 images, and thus the need to ensure spatially consistent imaging through time? Worth stating that here if so. Also, why was co-registration not performed for the ARGON mosaic? Considerable positional errors can exist in those images, and likely exist in the Kim et al. mosaic too.

The Landsat 1-4 image scenes were co-registered due to geolocation issues and the need to ensure spatially consistent imaging through time, as suggested above. This will be clarified within the manuscript. In contrast, co-registration was not conducted for the ARGON imagery as the mosaic produced by Kim et al. (2007) has already been orthorectified using GCPs. Nonetheless, the geolocation accuracy was manually checked before any subsequent analysis was conducted; the positions of coastal rock outcrops, nunataks and visibly stable ice features were observed to match those observed from the more recent Sentinel-2B scene. We will clarify that such prior co-registration and additional manual verification was conducted for the ARGON mosaic within Section 2.1.

L119 - ... are hereafter referred to as ...

Sentence structure will be changed to state 'are hereafter referred to as'.

L132 - ... the AutoRIFT feature tracking algorithm.

'auto-RIFT algorithms' will be changed to 'the AutoRIFT feature tracking algorithm'.

L135 - Typo? I believe ENVEO records date back to 2014?

This is correct and will be rephrased to provide clarification. Whilst the ENVEO velocity mosaics are available at a monthly resolution between 2014 and 2021, this sentence should state that only those between 2019 and 2021 were used within this study.

L136 - Suggest rephrasing to say "... using a combination of coherent and incoherent feature tracking techniques". (following Nagler et al. (2021; doi:10.1109/igarss47720.2021.9553514) which should also be cited here).

This will be rephrased with the Nagler et al. (2021) citation also added.

L184-197 - As the authors are aware, the grounding line and hinge line are two different components of the grounding zone, the latter being a proxy for the former which cannot be detected from satellite imaging. This fact should be stated somewhere in this paragraph, if anything to make it clear that the two components haven't been conflated.

The difference between the grounding line and the hinge line will be stated within this paragraph. We note that on L223-224, we later state: "Whilst the AIS CCI and MEaSURES products both represent the inner limit of tidal flexure and thus approximate the actual grounding line position (Fricker et al., 2009; Rignot et al., 2016)...", thereby implying that the hinge line is used as a proxy for the grounding line position. Nonetheless, we appreciate that the manuscript would be improved with more explicit definitions of the two components at the beginning of the grounding line section.

L206/7 - '...was generated using...as applied to ERS-1 and ERS-2 imagery...'.

This sentence explains that the MEaSURES grounding line product was not only generated using the same DInSAR technique as that used to generate the AIS CCI dataset, but that both datasets also used ERS-1 and ERS-2 imagery collected in 1996. We therefore think that use of the word 'also' is preferable over use of the word 'as'. The sentence will thus be changed to read:

"The Making Earth Science Data Records for Use in Research Environments (MEaSURES) grounding line product was generated using similar DInSAR techniques as previously described for the AIS CCI product, also applied to ERS-1 and ERS-2 imagery collected in 1996 (Rignot et al., 2016)."

L216 - Should read '...and most seaward, spatially continuous break-in-slope' (since multiple discontinuous breaks-in-slope can exist downstream over, for example, pinning points or ice rumples).

'spatially continuous break-in-slope' will be added.

L227 - Following my comments on L184-197, I think it's important to state here that it's difficult to compare break-in-slope and hinge line positions in a direct/like-for-like manner, because they're ultimately measuring two very different components of the grounding zone. Therefore, even given the standalone instrument/technique errors shown in Table 2, any changes in GL position identified from the two techniques should be interpreted with caution, with any further discussion restricted to those exhibiting pronounced retreat where we can be confident change represents a true signal.

This is a valid point and will be emphasised within Section 2.5.

L230-234 - I'm not sure I follow this, and specifically why the two GLs would be so far apart. Geocoding issues? Tidal effects (if different imaging dates)? Both? Additional information explaining this would be good here.

We agree that this is slightly confusing, and would like to emphasise that we were also puzzled as to why the two grounding lines would be so far apart. This motivated our decision to measure retreat relative to the most landward observed 1996 position, in order to ensure that we reported the most conservative estimate of grounding line retreat at Underwood Glacier. No explicit explanation is provided in the documentation associated with the dataset (Rignot et al., 2016), with the 'Quality Assessment' simply stating:

"The standard error is  $\pm 100$  m, with greater geolocation variations locally. In some cases, large (km) short-term and long-term migrations are present. The quality of the grounding line mapping depends on the satellite data used, the length of the interferometric baseline (short baselines yield more accurate positioning), the amplitude of the differential tides, phase coherence (high phase coherence means less noise), and the frequency of revisits."

Whilst tidal effects were considered, the metadata provided with each GL states that both positions were mapped using imagery from the same European Space Agency Earth Remote Sensing Satellite (ERS), across the same acquisition dates (1996/2/6, 1996/2/7, 1996/3/12 and 1996/3/13). We will therefore try to contact the creators of the dataset in order to seek an explanation for the different GL positions. Any clarification provided will subsequently be added to the manuscript.

Fig.2 - Suggest noting the non-linear x-axis scale in the caption or, even better, editing the figures to show a linear scale.

The x-axis scale is linear, however the tick marks were placed at irregular spacings. This decision was made in an attempt to allow the reader to better understand the exact timings of the terminus digitisations, particularly across the earlier years of the record. For example, it can clearly be seen that the terminus positions of Vanderford, Adams and Anzac glacier were first observed in 1963,

whereas Bond East, Bond West and Underwood Glacier were first observed in 1973. However, we appreciate that such irregular spacing may be confusing to the reader and potentially misinterpreted as a non-linear scale. The labelled tick marks will therefore instead be placed at regular 10-year intervals between 1960 and 2020, with minor tick marks shown every 5 years.

Fig.3 - Nice figure. Caption should read '...from the USGS Earth Explorer data repository' or similar.

'data repository' will be added.

Fig.4 - Nice figure, but what does, for example 'Distance from VA' mean on the x-axis? Does this literally mean from the 'VA' label on Figure 1? If so, suggest changing the notion to read 'Distance downstream' (or similar), and annotating VA to VA on both Fig.1 and the cross section profiles of Fig.4.

The Figure 4 x-axis title will be changed to state 'Distance along VA flowline (km)', 'Distance along AD flowline (km)', 'Distance along AN flowline (km)', etc. The figure caption will also be edited to explicitly state that distance is measured in the downstream direction, with 0 km therefore representing the inland start point of each flowline.

L290 - Associated errors. This is great, but please also show these errors on Fig 5 too.

We recognise that the associated errors could be added to Figure 5, but because each individual graph displays the mean annual velocity across each of the IN, GL and FT boxes, this addition makes Figure 5 rather busy. Instead, we believe it would be more helpful to maintain the clarity of Figure 5, but ensure that for each specific velocity value reported in Section 3.2, the associated error is stated. For example, L290 will be changed to state:

“Whilst ice surface velocity was seen to increase by 12% across the FT of Anzac Glacier between 2009 and 2021 (Figure 5c), this velocity increase was not deemed notable, with the absolute value of acceleration (30 m/yr) being smaller than the associated error ( $\pm 82$  m/yr).”

Figs. 6 and 7 - These are clear, detail-rich figures. My one thought, however, is whether they could be merged somehow to save the reader flicking back and forth between figs?

The Smith et al. (2020) dataset shown in Figure 7 simply provides a value representing the average rate of surface elevation change observed between 2003 and 2019. In contrast, each of the Schröder et al. (2019) and Nilsson et al. (2022) datasets shown in Figure 6 represent monthly surface elevation change values. Whilst the Smith et al. (2020) dataset may be added to Figure 6 in the form of a linear trendline with a constant gradient, an arbitrary elevation would have to be chosen in 2003 which could potentially be misleading. Inclusion of such a linear trendline may also distract from the interannual variability captured by the 24-month rolling means calculated from the Schröder et al. (2019) and Nilsson et al. (2022) datasets. The decision was therefore made to not include the Smith et al. (2020) dataset within Figure 6. Instead, the Smith et al. (2020) dataset was primarily used to validate and provide further certainty to the long-term trends extracted from the Schröder et al. (2019) and Nilsson et al. (2022) datasets, with Figure 7 used to highlight the spatial variation in ice surface elevation change observed within Vincennes Bay.

L340 - Following my comment on L227, I think it's important to mention here that the retreat observed falls greatly outside sensor error limits, and likely also any between-sensor uncertainties associated with combined DInSAR/break-in-slope comparisons.

This is a helpful point that will be added.

Fig 8 - This is a nice figure, although I question whether it's integral to the interpretation presented. I think a revised version of Fig. 9 with each GL position shown would be far more impactful, with Fig. 8 moved to the supplementary information instead. Either way, remove the word 'manually' from the caption since the methods states that both break-in-slope and DInSAR mapping was carried out in this way.

We appreciate the reviewers comment, but think that Figure 8 is important and integral to the manuscript for two primary reasons:

1) As previously stated in the general comments, Figure 8 is useful for showing the temporally variable patterns of grounding line retreat observed between 1996 and 2020. It highlights that the grounding line positions mapped from optical imagery (ASAIID and MOA datasets) were digitised in near-identical locations at each of the Vincennes Bay outlet glaciers, with the notable exception of Vanderford Glacier. Such near-identical locations would not be visible to the reader if placed as vertical lines on Figure 9, which we think would detract from the associated discussion.

2) The symbology used within Figure 8 allows the reader to assess the different methods used to quantify grounding line retreat. We believe this is unique to the manuscript and provides important context for the later discussion of the importance of accurate DInSAR grounding line mapping.

Nonetheless, the figure caption will be changed to remove the word ‘manually’ as suggested.

Fig 9 - Please add each GL location to portray the temporal evolution of retreat more clearly, and if needed revise the results/discussion to reflect any temporal patterns of retreat this reveals (see also my **General Comment** on this point).

As discussed above, we don’t think that Figure 9 is suitable for displaying the temporal evolution of grounding line retreat clearly. This is primarily due to the near-identical ASAIID and MOA grounding line positions observed at 5 of the 6 studied glaciers, which would be difficult for the reader to observe as dated vertical lines. However, Figure 9 still provides important context of both the bed and ice surface elevation along each flowline. We therefore think there is value in keeping both Figure 8 and Figure 9 in the manuscript, and note that the total of 12 figures is not considered excessive for a paper published in *The Cryosphere*. We will, however, include additional discussion of the temporal patterns of retreat observed using both figures, particularly emphasising the sustained and consistent retreat observed at Vanderford Glacier.

L368-375 - I have two comments about this paragraph. First, I believe this is a significant finding which could/should be better articulated both here and in the abstract and conclusion. By my understanding this places Vanderford Glacier as the 4<sup>th</sup> fastest retreating glacier in Antarctica (let alone East Antarctica) over the satellite era, only after Thwaites (0.8 kmyr = 3<sup>rd</sup>, as mentioned by the authors, Pine Island (0.9-1 kmyr= 2<sup>nd</sup>, Park et al., 2013; doi:10.1002/grl.50379) and Pope (3.3 kmyr = 1<sup>st</sup>, Millilo et al., 2022; doi:10.1038/s41561-021-00877-z).

We will emphasise the significance of the rapid rate of grounding line retreat observed at Vanderford Glacier more, both in this paragraph and within the abstract and conclusion.

That said, I was a little surprised to see no discussion of Rignot et al. (2019) here, who following Line 84 report the same rate of retreat between 1996 and 2017 (i.e. overlapping 90% of the present study’s observational period). As such, I believe this paragraph (and elsewhere) should be reworked to better contextualize the author’s findings against this study.

[NB: I don’t think the above suggestion will necessarily detract from the novelty of the present study, as long as it’s made clear your observations show the *continued* rapid retreat of Vanderford Glacier to 2020].

As stated in our earlier response to the general comments, we appreciate that the manuscript needs to better emphasise that our study not only supports the 0.8 km/yr of grounding line retreat **previously** observed at Vanderford by Rignot et al. (2019), but importantly also suggests **continued** rapid retreat has occurred between 2017 and 2020.

However, we think it is important to emphasise that the Rignot et al. (2019) paper aimed to ‘evaluate the state of the mass balance of the Antarctic Ice Sheet over the last four decades’ and therefore placed less focus on specific individual glaciers. As a result, Vanderford Glacier was only mentioned twice in the entire manuscript, with a single sentence regarding the extensive grounding line retreat: ‘Vanderfjord experienced a spectacular grounding line retreat of 17 km between 1996 and 2017 (SI Appendix Fig. S2)’. The associated supplementary figure simply shows double difference interferograms from 1996 and 2017, with the grounding line positions displayed.

Whilst this paragraph (and elsewhere) will be reworked to better contextualize our findings against that of Rignot et al. (2019), we believe our manuscript offers detailed insights unable to be covered within the much wider-scale analysis conducted by Rignot et al. (2019).

L416-419 - So what caused this significant GL retreat then? Discussion of passive ice according to Furst et al. is good, but strikes me as a convenient diversion away from what should be the main focus of this paragraph. A revised discussion of the expected key drivers of this phenomenon will make for a much more compelling read, even if the interpretation is ‘the causes remain unknown and an important region for future research’ or the like.

We think that Section 4.1 outlines what may be causing the significant GL retreat, with clear discussion of the potential intrusion of warm mCDW along the Vanderford Trench at depth. However, we will try to strengthen this discussion further by including content from a later suggestion made by the anonymous reviewer. We will emphasise that in Antarctica, the majority of basal melting is confined to the GL and thus, as stated below, the more moderate thinning signals observed elsewhere may instead reflect lagged responses resulting from historical perturbations at the GL.

Fig 11 - If GLs are added to Fig.1 (see my comments on that figure above), then I'd consider moving Fig.11 to the supplementary information to avoid figure repetition in the main text.

As explained previously, we think the addition of further GLs makes Figure 1 too cluttered and displays the main findings of the paper before the context has been established, potentially confusing the reader. We therefore think Figure 11 should remain in the manuscript and note that a total of 12 figures is not considered excessive for a paper published in *The Cryosphere*. It should also be noted that the Vanderford flowline is extended in Figure 11 and therefore serves an important role in highlighting the inland retrograde slope observed along the Vanderford Trench.

L450-476 - How has landfast sea ice changed between 1996 and present? An increasing amount of research has shown the importance of landfast sea ice/mélange for controlling calving rates in Antarctica (by congealing together / buttressing ice fronts), which I think should also be noted here. (See papers by e.g. Greene et al. (doi:10.5194/tc-12-2869-2018), Francis et al. (doi:10.5194/tc-15-2147-2021), Fraser et al. (doi:10.5194/essd-12-2987-2021), Arthur et al. (doi:10.1017/jog.2021.45), Christie et al. (doi:10.1038/s41561-022-00938-x) and Massom et al. (doi:10.1038/s41586-018-0212-1) for some recent examples of this in Antarctica).

L498-510 – OK, the majority of this paragraph goes on to discuss the importance of landfast sea ice for controlling terminus stability, but it seems largely out of place to me in this section. All things considered, to improve readability/clarity I would suggest merging Sections 4.2 and 4.3 into a new, single section which first overviews the observed glaciological changes (frontal retreat and thinning) and then discusses their possible links to sea-ice loss.

On a related note, recent work has also shown that decreased sea ice cover may also leave coastal regions vulnerable to the influence of storms or katabatic wind events which can disturb ocean surface slopes leading to enhanced strain-induced calving (see e.g. Francis et al. (doi:10.5194/tc-15-2147-2021; 10.1029/2021JD036424) and Christie et al. (doi:10.1038/s41561-022-00938-x) for recently documented examples of this phenomenon).

To my mind, these sorts of atmosphere-sea ice interactions (sea-ice debuttressing, wind-induced strain) are more likely to explain the observed patterns of calving than the mechanism proposed by Miles et al. 2016 (at least over the relatively short timescales considered here), because in Antarctica the majority of basal melting is confined to the GL (e.g. Rignot et al., 2013; doi:10.1126/science.1235798). This phenomenon doesn't occur by coincidence, and is because mCDW resides at the same depth as the GL. Elsewhere (including at the relatively much more shallow ice-shelf fronts), mCDW does not physically interact with the ice in such a way that can drive rapid frontal fracture/calving, and thus the more moderate thinning signals observed at those locations instead reflect lagged responses resulting from historical perturbations at the GL.

In response to the above four comments, we will consider merging Section 4.2 and 4.3 into a single section. However, we would like to highlight that whilst both sections discuss the same sea-ice forcing mechanism, they discuss glaciological changes on very different temporal scales. Section 4.2 analyses decadal patterns across the entire study period, whilst Section 4.3 focuses on the comparatively short and recent time period of 2017-2020. We therefore suggest that maintaining some kind of separation, even if simply just beginning a new paragraph, would be preferable. Nonetheless, we will strengthen this section by including additional discussion of the potential influence of decreased sea ice cover on the vulnerability of coastal regions to storms or katabatic wind events.

Section 4.4 – While interesting, most of this section reads like background information and less pertinent results which I’m not sure is best placed in (or integral to) the discussion. I suggest making this a supplementary discussion and alluding to it somewhere in Section 3.2.

We appreciate that this section is not integral to the main discussion of the paper. However, with Bond West Glacier observed to reach speeds in excess of Shirase Glacier, previously thought to be the fastest flowing outlet glacier in East Antarctica, we believe it will still be of interest to the readership of *The Cryosphere*. We will therefore include a shortened and more concise version of Section 4.4 within Section 3.2, simply presenting our findings as a notable result, rather than providing a more lengthy discussion.

Section 4.5 – Similar to Section 4.4, much of this section contains information which should belong in the Methods (especially given my comments on Lines 184-197 and 227). Following my suggestion for Line 340, I also think the discussion contained on Lines 539-545 could be removed as the signal-to-noise of break-in-slope-derived change relative to the 1996 DInSAR GL pick seems compelling. I further suspect that the pattern of retreat revealed by plotting each GL onto Fig.9 will support this conclusion.

We think that Section 4.5 represents an important discussion point of the paper, summarising the main methodological finding of the study. This section therefore builds upon the findings of Figure 8, providing a unique assessment of the different methods used to quantify grounding line retreat. With this glaciological parameter representing such an important indicator of dynamic change, we believe this discussion will be of interest to the readership of *The Cryosphere*.

However, we agree that the signal-to-noise of break-in-slope derived change relative to the 1996 DInSAR pick seems compelling. We will therefore alter the tone of L539-545 to suggest that whilst inferences made using break-in-slope derived grounding line positions are less certain than those made using DInSAR derived grounding line positions, the compelling signal-to-noise ratio suggests that reduced rates of grounding line retreat have indeed occurred at Adams, Anzac, Bond East, Bond West and Underwood Glacier, in comparison to Vanderford Glacier.

Section 5 – While acceptable as written, the conclusion is very long and could/should be overhauled to provide a much more succinct, punchy summary of the key findings and implications only. I expect this could be done in half a page or less. Structure-wise, I also find the discussion going from *GL retreat* to *terminus change* and then back to *GL retreat* to be confusing, so suggest that the ideas contained in the paragraphs beginning Lines 547 and 573 could be merged into one coherent narrative.

We don’t consider three paragraphs to be too excessive for a conclusion, however we will make the conclusion more succinct wherever possible. We also appreciate that switching from *GL retreat* to *terminus change* and then back to *GL retreat* may be confusing to the reader and will therefore restructure the conclusion to form one coherent narrative.

L550 – Same comment as Lines 368-375.

As stated in response to L368-375, we will emphasise the significance of the rapid rate of grounding line retreat observed at Vanderford Glacier more.

L585 – In these days of reproducibility I would strongly encourage the authors to archive and openly share their terminus positions via a repository such as Cryoport.

The digitised central flowlines, sampling boxes and terminus positions will be uploaded to a suitable data repository in order to make the data publicly accessible. We will cite the exact data repository in the final version, should the manuscript be accepted.

Table S1 – Table Caption – For completeness, insert ‘optical’ after ‘Details of’.

Caption will be changed to state ‘Details of the optical satellite imagery used within this study’.



### 3 Technical Comments

L33 – WAIS in this instance is a pronoun and so should not be preceded by ‘the’. Similarly, ‘embayment’ should be capitalized. Multiple such blunders exist throughout the manuscript, so it will be worth carefully going through the text and weeding these out.

The sentence reads ‘Recent mass loss from the WAIS has largely been concentrated...’. We therefore believe that in order to be grammatically correct, use of the word ‘the’ is required before ‘WAIS’. We note that this convention is regularly adopted within the literature, including published papers within *The Cryosphere*. Some recent examples include Maclennan et al. (2023) (<https://doi.org/10.5194/tc-17-865-2023>), Holland et al. (2022) (<https://doi.org/10.5194/tc-16-5085-2022>) and Schlemm et al. (2022) (<https://doi.org/10.5194/tc-16-1979-2022>).

However, we will ensure that ‘embayment’ is capitalised throughout the manuscript.

L37 – ‘grounding line retreat’ should read ‘grounding-line retreat’. This should be changed throughout the manuscript, including in the title. Same for phrases such as ‘ice-shelf thinning’, ‘ice-surface velocity’, ‘sea-ice production’ etc.

‘grounding line retreat’ will be changed to ‘grounding-line retreat’ throughout the manuscript, including in the title. Such changes will also be completed for the suggested phrases outlined above.

L208 – Tense issue. Suggest rewording to: ‘... has an overall, associated error of +/- 100m’.

This will be reworded as suggested in order to correct the tense issue.

L221 – Grammar. Why does the use of MODIS imagery mean that the error is 250 m? Suggest rephrasing for improved clarity.

This sentence will be rephrased in order to improve the clarity.

L291 – Typo? Think it should read ‘... at box IN accelerating from ...’.

This will be changed to state ‘... at box IN accelerating from ...’, as suggested.

L323 – ‘These trends’. What trends? Grammar. Perhaps the opening sentence of this paragraph could read something like: “Mirroring the elevation patterns observed by Schroder et al. (2019) and Nilsson et al. (2021), similar trends are found in the ICESat/ICESat-2-derived data of Smith et al. (2020) (Figure 7)”.

Sentence will be changed to that suggested above.

L406 – Insert comma after ‘(Figure 6a)’.

Comma will be inserted after ‘(Figure 6a)’.

L560 – Missing citation?

The prediction of both accelerated thinning and increased ice surface velocities represents our own suggestion based on the results and discussion presented, rather than that of another author.

Section 7 – Text missing?

A link to the supplementary material associated with this paper will be provided.
